# Supplementary material for: Predictors for Uptake of Vaccines Offered during the Second Year of Life: Second Dose of Measles-Containing Vaccine and Meningococcal Serogroup A-Containing Vaccine, Ghana, 2020
Source: MDPI journal article supplement (doi:10.3390/vaccines11101515), 2023-09-23
Supplement: s1 [file s1]

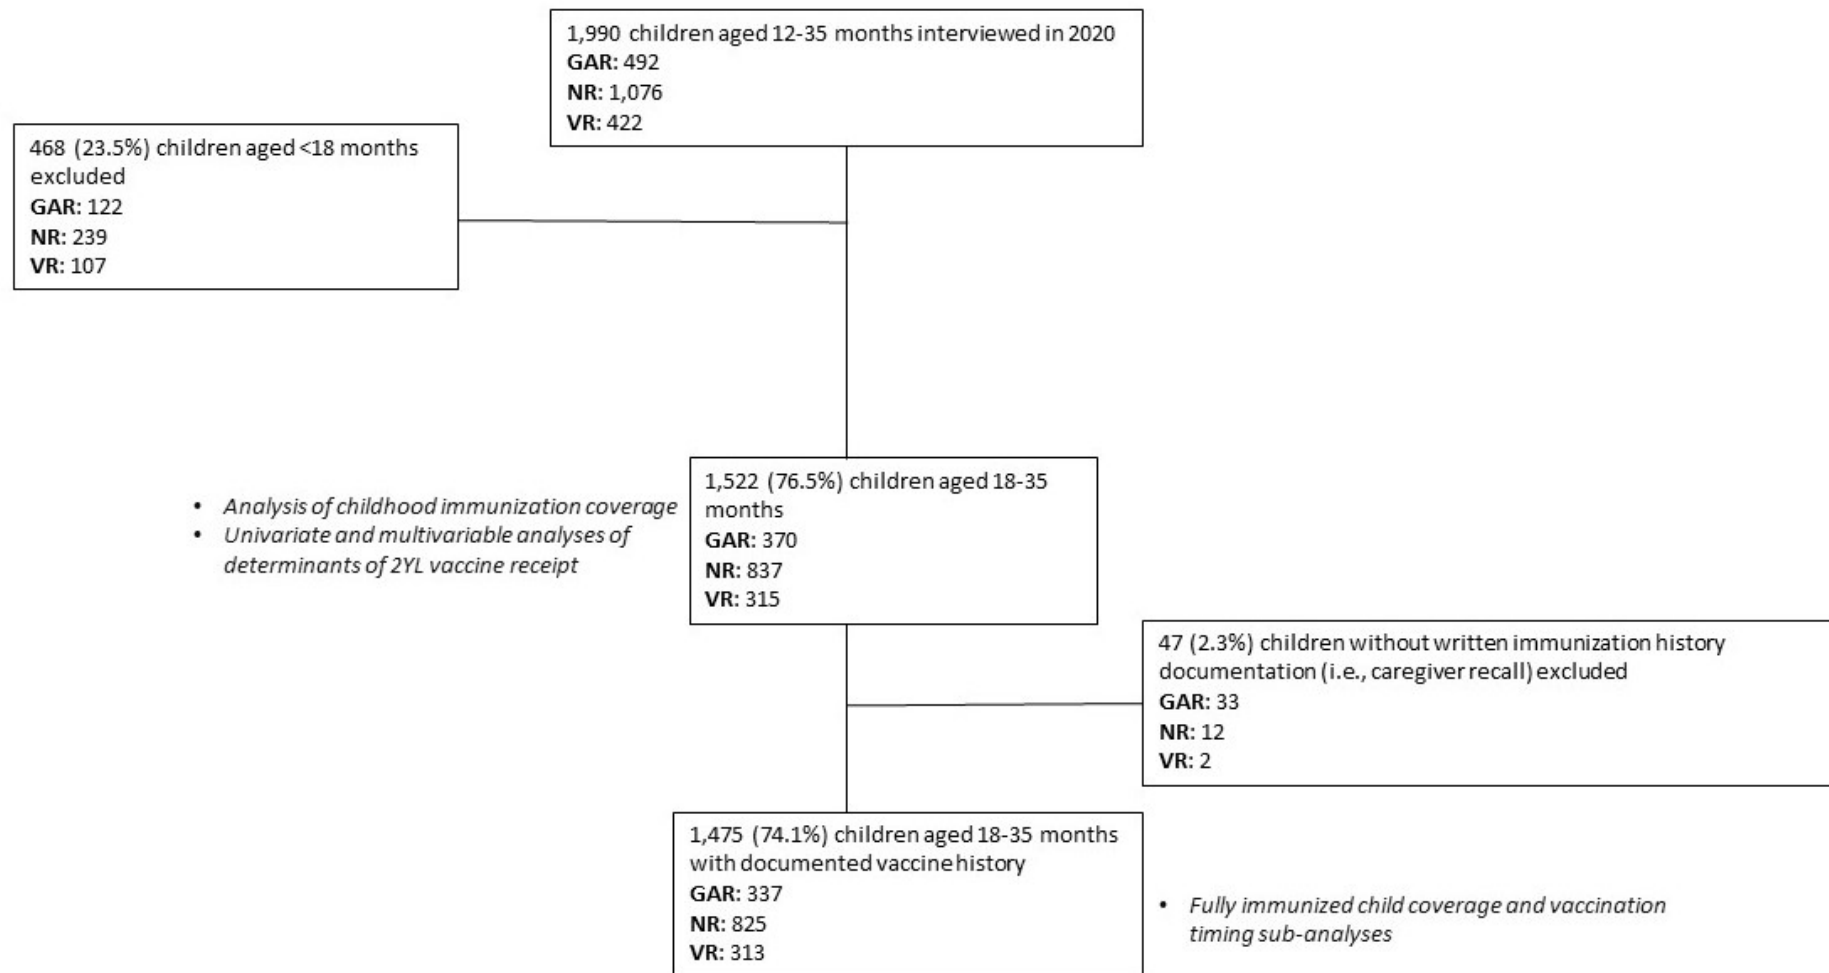

**Supplementary Figure S1:** Flowchart for selection of analytic samples.

**Supplementary Table S1.** Variables assessed as predictors of 2YL vaccine receipt

|                                   |
|-----------------------------------|
| <b>Child age group (months)</b>   |
| 18-23                             |
| 24-35                             |
| <b>Child's sex</b>                |
| Female                            |
| Male                              |
| <b>Birth order</b>                |
| First                             |
| Second                            |
| Third or more                     |
| <b>Maternal age (years)</b>       |
| <25                               |
| 25-34                             |
| ≥35                               |
| <b>Paternal age (years)</b>       |
| <25                               |
| 25-34                             |
| ≥35                               |
| <b>Maternal education</b>         |
| Never attended school             |
| Primary                           |
| Secondary or higher               |
| <b>Paternal education</b>         |
| Never attended school             |
| Primary                           |
| Secondary or higher               |
| <b>Maternal religion</b>          |
| Other                             |
| Christian                         |
| <b>Maternal marital status</b>    |
| Single/Divorced/Separated/Widowed |
| Married/Co-habiting               |
| <b>Settlement type</b>            |

|                                                                              |
|------------------------------------------------------------------------------|
| Urban                                                                        |
| Rural                                                                        |
| <b>Household size</b>                                                        |
| More than 6 members                                                          |
| 6 or less members                                                            |
| <b>Caregiver has access to phone for text messaging</b>                      |
| No                                                                           |
| Yes                                                                          |
| <b>Caregiver received phone reminder for 18 mo visit</b>                     |
| No reminder received                                                         |
| Reminder received                                                            |
| <b>Child attends school/daycare</b>                                          |
| No                                                                           |
| Yes                                                                          |
| <b>Child attends school/daycare offering routine immunization</b>            |
| No                                                                           |
| Yes                                                                          |
| <b>Child's HBR reviewed at school</b>                                        |
| No                                                                           |
| Yes                                                                          |
| <b>Fully immunized child by 12 mo</b>                                        |
| No                                                                           |
| Yes                                                                          |
| <b>Caregiver knows someone with measles</b>                                  |
| No                                                                           |
| Yes                                                                          |
| <b>Caregiver knows 2 doses are needed for full protection</b>                |
| No                                                                           |
| Yes                                                                          |
| <b>Caregiver knows MCV dose should be given during 2YL</b>                   |
| No                                                                           |
| Yes                                                                          |
| <b>Caregiver knows MACV dose should be given during 2YL</b>                  |
| No                                                                           |
| Yes                                                                          |
| <b>Caregiver thinks more than one MCV dose is needed for full protection</b> |

|                                                                                           |     |
|-------------------------------------------------------------------------------------------|-----|
|                                                                                           | No  |
|                                                                                           | Yes |
| <b>Caregiver knows MCV doses are given at 9 &amp; 18 mo</b>                               |     |
|                                                                                           | No  |
|                                                                                           | Yes |
| <b>Caregiver knows MACV dose is given at 18 mo</b>                                        |     |
|                                                                                           | No  |
|                                                                                           | Yes |
| <b>Caregiver aware of need for 18 mo visit before 2nd birthday</b>                        |     |
|                                                                                           | No  |
|                                                                                           | Yes |
| <b>Caregiver believes healthcare provider provides enough information on 2YL vaccine</b>  |     |
|                                                                                           | No  |
|                                                                                           | Yes |
| <b>Healthcare provider is caregiver's most trusted source of immunization information</b> |     |
|                                                                                           | No  |
|                                                                                           | Yes |
| <b>Caregiver believes vaccines protect against VPDs</b>                                   |     |
|                                                                                           | No  |
|                                                                                           | Yes |
| <b>Caregiver believes vaccines are safe</b>                                               |     |
|                                                                                           | No  |
|                                                                                           | Yes |
| <b>Caregiver believes completely unvaccinated children are vulnerable to disease</b>      |     |
|                                                                                           | No  |
|                                                                                           | Yes |
| <b>Caregiver believes unvaccinated children can infect others</b>                         |     |
|                                                                                           | No  |
|                                                                                           | Yes |
| <b>Caregiver believes 2YL vaccine is important for child</b>                              |     |
|                                                                                           | No  |
|                                                                                           | Yes |
| <b>Caregiver believes 2YL vaccine is important for other children</b>                     |     |
|                                                                                           | No  |
|                                                                                           | Yes |
| <b>Both father and mother involved in decision to vaccinate child</b>                     |     |

|                                                                  |
|------------------------------------------------------------------|
| No                                                               |
| Yes                                                              |
| <b>Caregiver believes 2YL vaccination is supported by spouse</b> |
| No                                                               |
| Yes                                                              |

**Supplementary Table S2.** Model output for the predictors of MCV2 receipt in Greater Accra Region with interaction term for school availability of RI services and settlement type.

|                                                             | aOR | 95 % CI  | P value |
|-------------------------------------------------------------|-----|----------|---------|
| <b>Child's sex</b>                                          |     |          |         |
| Female                                                      | REF |          |         |
| Male                                                        | 1.0 | 0.5–2.1  | 0.923   |
| <b>Birth order</b>                                          |     |          |         |
| First                                                       | REF |          |         |
| Second                                                      | 0.7 | 0.2– 2.7 | 0.698   |
| Third or more                                               | 0.3 | 0.2–0.8  | 0.016   |
| <b>Maternal education</b>                                   |     |          |         |
| Never attended school                                       | REF |          |         |
| Primary                                                     | 1.5 | 0.5–5.0  | 0.468   |
| Secondary or higher                                         | 2.0 | 0.9–4.7  | 0.069   |
| <b>Maternal age (years)</b>                                 |     |          |         |
| <25                                                         | REF |          |         |
| 25-34                                                       | 2.4 | 0.5–11.4 | 0.265   |
| ≥35                                                         | 2.8 | 0.8–9.2  | 0.087   |
| <b>Maternal religion</b>                                    |     |          |         |
| Other                                                       | REF |          |         |
| Christian                                                   | 1.1 | 0.5–2.5  | 0.853   |
| <b>Settlement type</b>                                      |     |          |         |
| Urban                                                       | REF |          |         |
| Rural                                                       | 4.7 | 0.8–28.9 | 0.094   |
| <b>Attends school/daycare offering routine immunization</b> |     |          |         |
| No                                                          | REF |          |         |
| Yes                                                         | 0.8 | 0.3–1.9  | 0.567   |

| Interaction term                                          | 0.1 | 0.02–0.8 | 0.031 |
|-----------------------------------------------------------|-----|----------|-------|
| <b>Fully immunized child by 12 mos.</b>                   |     |          |       |
| No                                                        | REF |          |       |
| Yes                                                       | 4.0 | 1.7–9.4  | 0.002 |
| <b>Caregiver knows MR dose should be given during 2YL</b> |     |          |       |
| No                                                        | REF |          |       |
| Yes                                                       | 2.4 | 1.2–4.9  | 0.017 |

**Supplementary Table S3.** Joint effects of settlement type and school RI service availability on MCV2 receipt among children aged 18–35 months in Greater Accra Region

|                                                                                                                       | aOR | 95% CI   | P value |
|-----------------------------------------------------------------------------------------------------------------------|-----|----------|---------|
| Urban school; no RI service available                                                                                 | REF |          |         |
| Urban school; RI service available                                                                                    | 0.8 | 0.3–1.9  | 0.567   |
| Rural school; no RI service available                                                                                 | 4.7 | 0.8–28.9 | 0.094   |
| Rural school; RI service available                                                                                    | 0.4 | 0.2–1.2  | 0.102   |
| Joint effects were calculated from the model with the interaction term using the lincom post-estimation Stata command |     |          |         |

**Supplementary Table S4:** MCV2 coverage among children aged 18–35 months by availability of RI services at school and settlement type in Greater Accra region, Ghana, 2020

| MCV2<br>dose<br>received | Urban                                                     |                  |                  |         | Rural             |                  |                   |         |
|--------------------------|-----------------------------------------------------------|------------------|------------------|---------|-------------------|------------------|-------------------|---------|
|                          | Attends school/daycare offering routine immunization (RI) |                  |                  |         |                   |                  |                   |         |
|                          | No                                                        | Yes              | Total            | P value | No                | Yes              | Total             | P value |
| No                       | 83                                                        | 22               | 105              |         | 12                | 3                | 15                |         |
|                          | 37.4 (31.1,44.1)                                          | 23.1 (15.8,32.5) | 33.2 (27.9,39.1) | 0.011   | 24.6 (12.6, 42.5) | 35.3 (23.9,48.6) | 27.13 (16.5,41.3) | 0.094   |
| Yes                      | 147                                                       | 72               | 219              |         | 27                | 4                | 31                |         |
|                          | 62.6 (55.9,68.9)                                          | 76.9 (67.5,84.3) | 66.8 (60.9,72.1) |         | 75.4 (57.5,87.4)  | 64.7 (51.4,76.1) | 72.87 (58.7,83.5) |         |

|       |        |        |        |        |        |        |
|-------|--------|--------|--------|--------|--------|--------|
| Total | 230    | 94     | 324    | 39     | 7      | 46     |
|       | 100.00 | 100.00 | 100.00 | 100.00 | 100.00 | 100.00 |

First row shows the *unweighted counts* and second row has *MCV2 coverage with 95% CIs*  
P value represents significance of design-based chi square test
